# Supplementary material
Source: MDPI journal article supplement (https://www.mdpi.com/2073-4433/13/2/247)
Supplement: s1 [file s1 › atmosphere-1557887-supplementary.pdf]

# Supplementary Materials:

Mahendra Sethi <sup>1,2,\*</sup>, Li-jing Liu <sup>3,4</sup>, Eva Ayaragarnchanakul <sup>2,5</sup>, Aki Suwa <sup>6</sup>, Ram Avtar <sup>7</sup>, Akhilesh Surjan <sup>8</sup> and Shilpi Mittal <sup>1,9</sup>

**Supplementary Table S1: List of 49 Five-Million+ Population Cities,** There are 49 urban agglomerations across 15 countries (Australia, Bangladesh, China, India, Indonesia, Iran, Japan, Malaysia, Myanmar, Pakistan, Philippines, Republic of Korea, Singapore, Thailand, and Viet Nam) in Asia-Pacific with population of at least (or approaching) 5 million in 2020 (listed below).

| Rank | Urban Agglomeration | Country              | Population (2020) |
|------|---------------------|----------------------|-------------------|
| 1    | Tokyo               | Japan                | 37,393,128        |
| 2    | Delhi               | India                | 30,290,936        |
| 3    | Shanghai            | China                | 27,058,480        |
| 4    | Dhaka               | Bangladesh           | 21,005,860        |
| 5    | Beijing             | China                | 20,462,610        |
| 6    | Mumbai              | India                | 20,411,274        |
| 7    | Osaka               | Japan                | 19,165,340        |
| 8    | Karachi             | Pakistan             | 16,093,786        |
| 9    | Chongqing           | China                | 15,872,179        |
| 10   | Kolkata             | India                | 14,850,066        |
| 11   | Manila              | Philippines          | 13,923,452        |
| 12   | Tianjin             | China                | 13,589,078        |
| 13   | Guangzhou           | China                | 13,301,532        |
| 14   | Lahore              | Pakistan             | 12,642,423        |
| 15   | Shenzhen            | China                | 12,356,820        |
| 16   | Bangalore           | India                | 12,326,532        |
| 17   | Chennai             | India                | 10,971,108        |
| 18   | Jakarta             | Indonesia            | 10,770,487        |
| 19   | Bangkok             | Thailand             | 10,539,415        |
| 20   | Hyderabad           | India                | 10,004,144        |
| 21   | Seoul               | Republic of Korea    | 9,963,452         |
| 22   | Nagoya              | Japan                | 9,552,132         |
| 23   | Tehran              | Iran                 | 9,134,708         |
| 24   | Chengdu             | China                | 9,135,768         |
| 25   | Nanjing             | China                | 8,847,372         |
| 26   | Ho Chi Minh City    | Viet Nam             | 8,602,317         |
| 27   | Wuhan               | China                | 8,364,977         |
| 28   | Ahmedabad           | India                | 8,059,441         |
| 29   | Xi-an Shaanxi       | China                | 8,000,965         |
| 30   | Kuala Lumpur        | Malaysia             | 7,996,830         |
| 31   | Hangzhou            | China                | 7,642,147         |
| 32   | Hong Kong           | China, Hong Kong SAR | 7,547,652         |
| 33   | Dongguan            | China                | 7,407,852         |
| 34   | Foshan              | China                | 7,326,852         |
| 35   | Shenyang            | China                | 7,220,104         |
| 36   | Surat               | India                | 7,184,590         |
| 37   | Suzhou              | China                | 7,069,992         |
| 38   | Pune                | India                | 6,629,347         |
| 39   | Harbin              | China                | 6,387,195         |
| 40   | Singapore           | Singapore            | 5,935,053         |
| 41   | Qingdao             | China                | 5,619,977         |
| 42   | Dalian              | China                | 5,617,849         |
| 43   | Fukuoka             | Japan                | 5,528,632         |
| 44   | Ji-nan Shandong     | China                | 5,360,185         |
| 45   | Yangon              | Myanmar              | 5,331,800         |
| 46   | Zhengzhou           | China                | 5,322,696         |
| 47   | Chittagong          | Bangladesh           | 5,019,824         |
| 48   | Melbourne           | Australia            | 4,967,733         |
| 49   | Sydney              | Australia            | 4,925,987         |

Source: United Nations, Department of Economic and Social Affairs, Population Division (2018). World Urbanization Prospects: The 2018 Revision, Accessed at: <https://population.un.org/wup/Download>

**Supplementary Table S2: The detailed data matrix of select 17 Asia-Pacific cities showing variability of data, information and action planning in the urban climate domain. Complete references of data are provided at the bottom of the table.**

|                  | Demographic and socio-economic data                                                                                                                                                                                                                                                                                                                                                                                                                                                                                                                                         | Urban data                                                                                                                        |                                                                                                                                               | Energy data                                                                                                                 | GHG Inventory                                                                                    | Climate Action Plan                                                                                                                 |
|------------------|-----------------------------------------------------------------------------------------------------------------------------------------------------------------------------------------------------------------------------------------------------------------------------------------------------------------------------------------------------------------------------------------------------------------------------------------------------------------------------------------------------------------------------------------------------------------------------|-----------------------------------------------------------------------------------------------------------------------------------|-----------------------------------------------------------------------------------------------------------------------------------------------|-----------------------------------------------------------------------------------------------------------------------------|--------------------------------------------------------------------------------------------------|-------------------------------------------------------------------------------------------------------------------------------------|
| City/<br>Country | Q1) Are the following data indicators available for the city or not?<br>1. Population<br>2. GDP, sectoral break-up: agriculture, industry, services),<br>3. Household Expenditure,<br>4. Poverty/ Income Inequality or GINI<br>5. Workforce or labour participation rate,<br>6. Employment or Unemployment rate,<br>7. Educational level (% of graduates),<br>8. Healthcare (Hospitals or doctors/ 1000 popln)<br><u>MENTION</u><br>Which one is not available<br>Q2) Are these available in unified form in a single document or website? If so, mention source/ reference | Does the city have a Master Plan or Regional/ Metropolitan Plan?                                                                  | Does the city have a disaster vulnerability or adaptation or resilience plan?                                                                 | Does the city have data or inventory on Energy consumption (in buildings-residence/ commercial, industry, transport, etc.)? | Does the city have a GHG / CO2 Inventory?                                                        | Does the city have an official Climate Action Plan/ Strategy Document?                                                              |
|                  |                                                                                                                                                                                                                                                                                                                                                                                                                                                                                                                                                                             | <u>MENTION</u><br>(Year, Reference)                                                                                               | <u>MENTION</u><br>(Year, Reference)                                                                                                           | <u>MENTION</u><br>(Year, Reference)                                                                                         | <u>MENTION</u><br>(Official/ Non-official, Year, Reference)                                      | <u>MENTION</u><br>(Yes/No, Year, Reference)                                                                                         |
| Australia        |                                                                                                                                                                                                                                                                                                                                                                                                                                                                                                                                                                             |                                                                                                                                   |                                                                                                                                               |                                                                                                                             |                                                                                                  |                                                                                                                                     |
| Sydney           | <b>1) YES</b><br>For 1,3,5-8 available in unified form (Australian Bureau of Statistics 2016a).<br><br>For 2. GDP (Greater Sydney Commission 2017)<br>For 4. Income Inequality (University of Sydney 2006)                                                                                                                                                                                                                                                                                                                                                                  | <b>YES</b><br>City Plan 2036 (Sydney City Council 2020).<br><br>Greater Sydney Region Plan (NSW 2017)                             | <b>PARTLY</b><br>Towards a Resilient Sydney (NSW 2013).<br><br>Adapting to the impacts of urban & natural hazards & climate change (GSC 2021) | <b>NO</b><br>Available for sectors at regional level (DISER 2020)                                                           | <b>YES</b><br>Carbon Neutral by 2035 (CNCA 2019)                                                 | <b>YES</b><br>Draft Environmental Strategy 2021-2025 (Sydney City Council 2018)                                                     |
| Melbourne        | <b>1) YES</b><br><b>For 1,3,5-8</b> available in unified form (Australian Bureau of Statistics 2016b).<br><br><b>For 2.</b> GDP, Employment, Income, Expenditure (REMPPLAN 2021)                                                                                                                                                                                                                                                                                                                                                                                            | <b>YES</b><br>Plan Melbourne (State Government of Victoria 2017)<br><br>Regional Growth Plans (State Government of Victoria 2019) | <b>YES</b><br>Climate Change Adaptation Strategy (MCC 2017).                                                                                  | <b>YES</b><br>Available for sectors at regional level (DISER 2020).<br><br>Melbourne City Energy Profile (NAGA 2012).       | <b>YES</b><br>Annual Report 2019-20 (MCC 2020).<br><br>Melbourne City Energy Profile (NAGA 2012) | <b>YES</b><br>Climate Change Mitigation Strategy 2050 (MCC 2018).                                                                   |
| China            |                                                                                                                                                                                                                                                                                                                                                                                                                                                                                                                                                                             |                                                                                                                                   |                                                                                                                                               |                                                                                                                             |                                                                                                  |                                                                                                                                     |
| Shanghai         | <b>1) For 1-3, 5-8</b> (SMBS 2021)<br>For 4. NA                                                                                                                                                                                                                                                                                                                                                                                                                                                                                                                             | <b>YES</b><br>Implementation of Shanghai Municipal Plan..2020 (SMDRC 2020a)<br><br>Shanghai Master Plan 2017-2035 (SUPLRAB 2018)  | <b>YES</b><br>Measures for the prevention of meteorological disasters 2017 (PGSM 2017)                                                        | <b>YES</b><br>Shanghai Statistical Yearbook 2020. (SMBS 2021)                                                               | <b>YES</b><br>Carbon Emission Accounts & Datasets 1997-2017 (CEADs 2018)                         | <b>YES</b><br>Shanghai's key work arrangements for energy conservation, emission reduction and climate change (SMDRC 2020b)         |
| Beijing          | <b>1) For 1-3, 5-8</b> (CSP-BIP 2021)<br>For 4. NA                                                                                                                                                                                                                                                                                                                                                                                                                                                                                                                          | <b>YES</b><br>Master plan 2016-2035 (BMCP LRM 2017)<br><br>Regional Plan 2015-2020 (PGBM 2017)                                    | <b>YES</b><br>Promoting Safe Urban Development (PGBM 2019)<br><br>Emergency plan for sudden geological disasters 2013 (BMCPNR 2013)           | <b>YES</b><br>Beijing Statistical Yearbook 2020 (BMBS 2021)                                                                 | <b>YES</b><br>Carbon Emission Accounts & Datasets. 1997-2017 (CEADs 2018)                        | <b>YES</b><br>Plan for Energy Saving, Consumption Reduction and Climate Change Addressing in Beijing during the 13th Five-Year Plan |

|           |                                                                                                                                                              |                                                                                            |                                                                                                                                                                |                                                                            |                                                                           |                                                                                                                                             |
|-----------|--------------------------------------------------------------------------------------------------------------------------------------------------------------|--------------------------------------------------------------------------------------------|----------------------------------------------------------------------------------------------------------------------------------------------------------------|----------------------------------------------------------------------------|---------------------------------------------------------------------------|---------------------------------------------------------------------------------------------------------------------------------------------|
|           |                                                                                                                                                              |                                                                                            |                                                                                                                                                                |                                                                            |                                                                           | Period 2016-2020 (PGBM 2016)                                                                                                                |
| Guangzhou | <b>1) YES, for 1- 8</b> (GSB 2021)                                                                                                                           | <b>YES</b><br>Master plan 2020 (GDRC 2020)<br>Regional Plan (PGGM 2021)                    | <b>YES</b><br>Geological Disaster Prevention and Control Plan (GMBPNR 2007)                                                                                    | <b>YES</b><br>Guangzhou Statistical Yearbook 2020 (GSB 2021)               | <b>NO</b>                                                                 | <b>YES</b><br>Guangdong's 13th Five-Year Plan on Climate Change 2016-2020 (GDRC 2017)                                                       |
| Tianjin   | <b>1) YES, for 1-3, 5-8</b> (TMBS 2021)<br>For 4. NA                                                                                                         | <b>YES</b><br>Master plan 2017-2035 (PGTM 2018)                                            | <b>YES</b><br>Geological disaster prevention and control plan 2020 (TMBPNR 2008)<br>Plan of Action to Enhance Capacity to Control Natural Disaster (PGTM 2019) | <b>YES</b><br>Tianjin Statistical Yearbook 2020 (TMBS 2021)                | <b>YES</b><br>Carbon Emission Accounts & Datasets. 1997-2017 (CEADs 2018) | <b>YES</b><br>Implementation Plan of Greenhouse Gas Emission Control in Tianjin during the 13th Five-Year Plan Period 2016-2020 (PGTM 2017) |
| Shenzhen  | <b>1) YES, for 1-3, 5-8</b> (SSB 2020)<br>For 4. NA                                                                                                          | <b>YES</b><br>Master Plan 2020 (SMBPNR 2010)<br>Regional Plan 2015-2020 (PGSM 2021)        | <b>YES</b><br>Geological disaster prevention and control plan (SMBPNR 2018)                                                                                    | <b>YES</b><br>Shenzhen Statistical Yearbook 2019 (SSB 2020)                | <b>NO</b>                                                                 | <b>YES</b><br>Shenzhen's 13th Five-Year Plan on Climate Change 2016-2020 (SDRC 2017)                                                        |
| India     |                                                                                                                                                              |                                                                                            |                                                                                                                                                                |                                                                            |                                                                           |                                                                                                                                             |
| New Delhi | <b>1) YES</b><br><b>For 1 to 8</b> (GNCTD 2020).<br>For 4. NA                                                                                                | <b>YES</b><br>Master Plan (DDA 2007)<br>Regional Plan (NCRPB 2005)                         | <b>YES</b><br>Disaster Management Plan (DDMA 2015)                                                                                                             | <b>NO</b><br>State Action Plan Climate Change (GNCTD 2017)                 | <b>YES</b><br>Comprehensive Study on GHGs (IIT Kanpur 2016)               | <b>YES</b><br>State Action Plan Climate Change (GNCTD 2017)                                                                                 |
| Mumbai    | <b>1) YES</b><br><b>For 1 to 8</b> Mumbai Human Development Report 2009 (MCGM 2010).<br>For 4. NA                                                            | <b>YES</b><br>Development Plan of Greater Mumbai (MCGM 2016).<br>Regional Plan (MMPC 2021) | <b>YES</b><br>Disaster Management Plan (MCGM 2019).                                                                                                            | <b>YES</b><br>Non-official for Navi Mumbai (TERI 2013)                     | <b>YES</b><br>Non- Official Emission Inventory (Urbanemission s 2018)     | <b>YES</b><br>Non-official for Navi Mumbai (TERI 2013)                                                                                      |
| Kolkata   | <b>1) YES</b><br>Kolkata City Population 2011–2021 (Census 2011a).<br>For 4. NA                                                                              | <b>YES</b><br>Landuse and Development Control Plan (KMDA 2008)                             | <b>YES</b><br>Disaster Management Plan (KMC 2020).                                                                                                             | <b>NO</b>                                                                  | <b>YES</b><br>Non- Official Emission Inventory (Urbanemission s 2018)     | <b>YES</b><br>Low Carbon and Climate Resilient Plan (PWC 2016)<br>Towards Resilient Kolkata (ADB 2018)                                      |
| Bengaluru | <b>1) YES</b><br>For 1,2,7 (IIHS 2014)<br>For 5, 6 (MOSPI 2015)<br>For 4. NA                                                                                 | <b>YES</b><br>Master Plan (BDA 2017)<br>Regional Plan (BMRDA 2017)                         | <b>NO</b><br>But available at state level (KSDMA 2019).                                                                                                        | <b>YES</b><br>Electricity Consumption Bengaluru City 2018-19 (MoHUA 2019a) | <b>YES</b><br>Non- Official Emission Inventory (Urbanemission s 2018)     | <b>NO</b><br>But available at state level (EMPRI-TERI 2013)                                                                                 |
| Chennai   | <b>1) YES</b> , common with district<br>Chennai District Population 2011–2021 (Census 2011b).<br>District Human Development Report (SPCTN 2017)<br>For 4. NA | <b>YES</b><br>Second Master Plan for Chennai Metropolitan Area, 2026 (CMDA 2008)           | <b>YES</b><br>Disaster Management (CMDA 2008).                                                                                                                 | <b>YES</b><br>Electricity Consumption Chennai City 2018-19 (MoHUA 2019b)   | <b>YES</b><br>Non- Official Emission Inventory (Urbanemission s 2018)     | <b>PARTLY</b><br>Non-official Resilient Chennai Strategy (CRC 2019)                                                                         |
| Japan     |                                                                                                                                                              |                                                                                            |                                                                                                                                                                |                                                                            |                                                                           |                                                                                                                                             |
